# Supplementary material for: DNCON2: improved protein contact prediction using two-level deep convolutional neural networks
Source: PubMed Central journal article supplement — Bioinformatics. 2017 Dec 8;34(9):1466–72. doi: 10.1093/bioinformatics/btx781 (PMC5925776; doi:10.1093/bioinformatics/btx781), 2017-12-08
Supplement: btx781_suppl_v1.2.pdf [file btx781_suppl_v1.2.pdf]

# Supplementary Document

## DNCON2: Improved protein contact prediction using two-level deep convolutional neural networks

Badri Adhikari<sup>1</sup>, Jie Hou<sup>1</sup>, and Jianlin Cheng<sup>1,2\*</sup>

<sup>1</sup>Department of Electrical Engineering and Computer Science, University of Missouri, Columbia, Missouri, 65211, USA. <sup>2</sup>Informatics Institute, University of Missouri, Columbia, Missouri, 65211, USA.

\*To whom correspondence should be addressed.

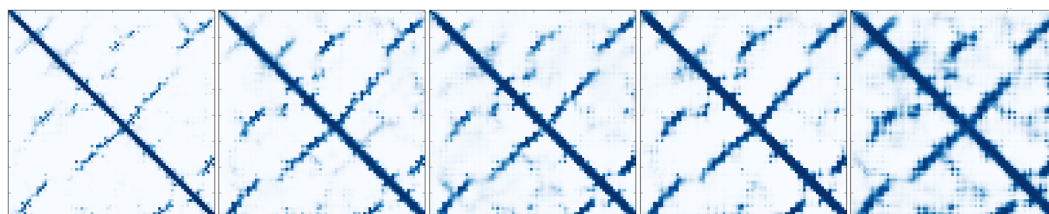

**Figure S1.** Contact maps predicted for chain A of the protein '1BDO' at distance thresholds 6, 7.5, 8, 8.5, and 10 Å (from left to right), showing the increase in the density/number of contacts as distance threshold is increased.

**Table S2.** List of features used in DNCON2. The first 20 features, excluding #18 and #19 (PSIPRED and PSISOLV predictions), are original DNCON features. Features numbered 21 through 27 (Shannon entropy through Mutual information) are coevolution-based features added in DNCON2.

| SN           | Feature                                                                                                                                                                | Number of Dimensions | Number of Features | Number of 2D Features |
|--------------|------------------------------------------------------------------------------------------------------------------------------------------------------------------------|----------------------|--------------------|-----------------------|
| 1            | Log of sequence length                                                                                                                                                 | Scalar               | 1                  | 1                     |
| 2            | Log of number of sequences in the alignment                                                                                                                            | Scalar               | 1                  | 1                     |
| 3            | Log of number of effective number of sequences in the alignment                                                                                                        | Scalar               | 1                  | 1                     |
| 4            | Ratio of number of 'buried' residues and length of the protein                                                                                                         | 1D                   | 1                  | 1                     |
| 5            | Ratio of number of 'strand' residues and length of the protein                                                                                                         | 1D                   | 1                  | 1                     |
| 6            | Ratio of number of 'helical' residues and length of the protein                                                                                                        | 1D                   | 1                  | 1                     |
| 7            | Atchley factors                                                                                                                                                        | 1D                   | 5                  | 10                    |
| 8            | Binary predictions for helix, coil, and strand residues (SCRATCH)                                                                                                      | 1D                   | 3                  | 6                     |
| 9            | Solvent accessibility - 'buried' flag (SCRATCH)                                                                                                                        | 1D                   | 1                  | 2                     |
| 10           | PSSM inf                                                                                                                                                               | 1D                   | 1                  | 2                     |
| 11           | PSSM Sums (divided by 100)                                                                                                                                             | 1D                   | 1                  | 2                     |
| 12           | PSSM sum cosines                                                                                                                                                       | 1D                   | 1                  | 2                     |
| 13           | Ratio of sequence separation and length of protein                                                                                                                     | 2D                   | 1                  | 1                     |
| 14           | Flag for sequence separation between 23 and 28                                                                                                                         | 2D                   | 1                  | 1                     |
| 15           | Flag for sequence separation between 28 and 38                                                                                                                         | 2D                   | 1                  | 1                     |
| 16           | Flag for sequence separation between 38 and 48                                                                                                                         | 2D                   | 1                  | 1                     |
| 17           | Flag for sequence separation 48+                                                                                                                                       | 2D                   | 1                  | 1                     |
| 18           | Probabilities of PSIPRED predictions for helix, coil, and strand residues                                                                                              | 1D                   | 3                  | 6                     |
| 19           | Probabilities of PSISOLV predictions for solvent accessibility                                                                                                         | 1D                   | 1                  | 2                     |
| 20           | Pre-computed statistical potentials (Pref score, Scld-lu contact potential, Levitt contact potential, Braun contact potential, Joint entropy, and Pearson correlation) | 2D                   | 6                  | 6                     |
| 21           | Shannon entropy sum of the alignment columns                                                                                                                           | 2D                   | 1                  | 1                     |
| 22           | CCMpred prediction                                                                                                                                                     | 2D                   | 1                  | 1                     |
| 23           | FreeContact prediction                                                                                                                                                 | 2D                   | 1                  | 1                     |
| 24           | PSICOV prediction                                                                                                                                                      | 2D                   | 1                  | 1                     |
| 25           | Mean contact potential (from alignment)                                                                                                                                | 2D                   | 1                  | 1                     |
| 26           | Normalized mutual information (from alignment)                                                                                                                         | 2D                   | 1                  | 1                     |
| 27           | Mutual information (from alignment)                                                                                                                                    | 2D                   | 1                  | 1                     |
| <b>Total</b> |                                                                                                                                                                        |                      | <b>40</b>          | <b>56</b>             |

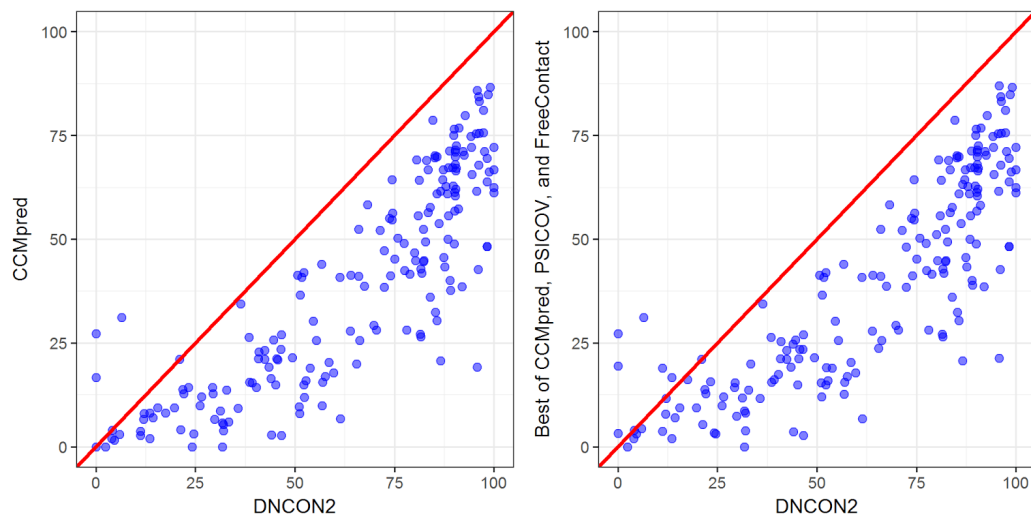

**Figure S3.** Performance of DNCON2 compared with the input coevolution-based features on the 195 proteins in the validation dataset, measured using the precision of top L/5 long-range contacts. The precisions of DNCON2’s predictions are compared with the precisions of best coevolution-based method CCMpred (left) and with the best of the three methods CCMpred, FreeContact, and PSICOV (right).

**Table S4.** Performance of DNCON2 on CASP12 free-modeling domains, measured using top L/5 and L/2 long-range contacts, and comparison with the state-of-the-art methods Raptor-X, MetaPSICOV, iFold\_1, and MULTICOM-NOVEL (DNCON).  $P_{\text{top-L/5}}$  and  $P_{\text{top-L/2}}$  stand for the precision of top L/5 and L/2 long-range contacts. The free-modeling domain T0907-D3 is excluded in the evaluation, because the native structure was not available for our evaluations.

| Domain     | Raptor-X             |                      | MetaPSICOV           |                      | iFold_1              |                      | DNCON                |                      | DNCON2               |                      |
|------------|----------------------|----------------------|----------------------|----------------------|----------------------|----------------------|----------------------|----------------------|----------------------|----------------------|
|            | $P_{\text{top-L/5}}$ | $P_{\text{top-L/2}}$ |
| T0859-D1   | 0.0                  | 3.5                  | 4.35                 | 8.77                 | 0.0                  | 0.0                  | 0.0                  | 8.8                  | 0.0                  | 0.0                  |
| T0862-D1   | 42.1                 | 29.8                 | 26.32                | 12.77                | 31.6                 | 21.3                 | 21.1                 | 12.8                 | 31.6                 | 14.9                 |
| T0863-D1   | 28.2                 | 17.5                 | 12.82                | 13.4                 | 10.3                 | 9.3                  | 5.1                  | 8.3                  | 12.8                 | 11.3                 |
| T0863-D2   | 23.6                 | 12.9                 | 6.94                 | 3.93                 | 5.6                  | 6.2                  | 4.2                  | 4.5                  | 12.7                 | 6.2                  |
| T0864-D1   | 80.0                 | 62.6                 | 64                   | 53.66                | 84.0                 | 77.2                 | 32.0                 | 20.3                 | 77.6                 | 56.1                 |
| T0866-D1   | 95.2                 | 84.6                 | 100                  | 96.15                | 95.2                 | 90.4                 | 14.3                 | 15.4                 | 90.5                 | 78.9                 |
| T0869-D1   | 57.1                 | 36.5                 | 52.38                | 32.69                | 4.8                  | 1.9                  | 47.6                 | 42.3                 | 52.4                 | 32.7                 |
| T0870-D1   | 12.0                 | 11.3                 | 8                    | 14.52                | 40.0                 | 24.2                 | 40.0                 | 19.4                 | 24.0                 | 16.1                 |
| T0878-D1   | 24.6                 | 23.8                 | 43.48                | 31.98                | 55.1                 | 45.4                 | 26.1                 | 16.9                 | 59.4                 | 38.4                 |
| T0880-D2   | 21.9                 | 15.2                 | 25                   | 16.46                | -                    | -                    | 18.8                 | 13.9                 | 48.4                 | 36.7                 |
| T0886-D1   | 100.0                | 88.6                 | 100                  | 91.43                | 100.0                | 85.7                 | 7.1                  | 5.7                  | 100.0                | 82.9                 |
| T0886-D2   | 92.3                 | 82.8                 | 100                  | 89.06                | 100.0                | 82.8                 | 23.1                 | 18.8                 | 100.0                | 93.8                 |
| T0888-D1   | 24.0                 | 18.0                 | 4                    | 8.2                  | 4.0                  | 8.2                  | 0.0                  | 3.3                  | 54.2                 | 29.5                 |
| T0890-D2   | 18.2                 | 17.0                 | 13.64                | 15.09                | 0.0                  | 11.3                 | 9.1                  | 7.6                  | 19.1                 | 15.1                 |
| T0892-D2   | 72.7                 | 52.7                 | 63.64                | 49.09                | 63.6                 | 38.2                 | 63.6                 | 41.8                 | 68.2                 | 49.1                 |
| T0894-D1   | 5.6                  | 8.9                  | 0                    | 13.33                | 77.8                 | 55.6                 | 55.6                 | 37.8                 | 88.9                 | 48.9                 |
| T0896-D3   | 0.0                  | 4.9                  | 3.03                 | 2.47                 | 15.2                 | 16.1                 | 9.1                  | 12.4                 | 12.5                 | 6.2                  |
| T0897-D1   | 10.7                 | 5.8                  | 3.57                 | 4.35                 | 0.0                  | 4.4                  | 17.9                 | 8.7                  | 3.6                  | 7.3                  |
| T0897-D2   | 12.0                 | 8.1                  | 16                   | 9.68                 | 16.0                 | 17.7                 | 20.0                 | 9.7                  | 48.0                 | 27.4                 |
| T0898-D1   | 31.8                 | 24.5                 | 27.27                | 22.64                | 4.6                  | 5.7                  | 13.6                 | 15.1                 | 19.1                 | 15.1                 |
| T0899-D1   | 84.6                 | 56.9                 | 86.54                | 57.69                | 75.0                 | 51.5                 | 40.4                 | 20.8                 | 90.4                 | 56.9                 |
| T0899-D2   | 66.7                 | 52.3                 | 61.11                | 47.73                | 50.0                 | 43.2                 | 33.3                 | 22.7                 | 55.6                 | 34.1                 |
| T0900-D1   | 33.3                 | 31.4                 | 95.24                | 74.51                | 23.8                 | 19.6                 | 71.4                 | 52.9                 | 95.0                 | 82.4                 |
| T0901-D2   | 42.9                 | 25.7                 | 50                   | 37.14                | 100.0                | 74.3                 | 42.9                 | 28.6                 | 100.0                | 57.1                 |
| T0904-D1   | 27.5                 | 23.0                 | 25.49                | 19.84                | 66.7                 | 44.4                 | 29.4                 | 22.2                 | 84.0                 | 63.5                 |
| T0905-D1   | 93.9                 | 77.7                 | 93.88                | 77.69                | 98.0                 | 87.6                 | 63.3                 | 35.5                 | 89.6                 | 64.5                 |
| T0905-D2   | 71.4                 | 51.5                 | 71.43                | 45.45                | 92.9                 | 66.7                 | 42.9                 | 33.3                 | 84.6                 | 54.6                 |
| T0912-D3   | 71.4                 | 42.3                 | 42.86                | 26.92                | 81.0                 | 44.2                 | 4.8                  | 3.9                  | 81.0                 | 63.5                 |
| T0914-D1   | 34.4                 | 20.3                 | 3.12                 | 5.06                 | 21.9                 | 12.7                 | 31.3                 | -                    | 18.8                 | 10.1                 |
| T0914-D2   | 15.2                 | 14.8                 | 15.15                | 11.11                | 18.2                 | 13.6                 | 15.2                 | -                    | 21.9                 | 13.6                 |
| T0915-D1   | 41.9                 | 31.2                 | 38.71                | 23.38                | 19.4                 | 16.9                 | 29.0                 | 22.1                 | 32.3                 | 23.4                 |
| T0918-D1   | 81.8                 | 72.2                 | 72.73                | 62.96                | 54.6                 | 57.4                 | 40.9                 | 22.2                 | 81.8                 | 70.4                 |
| T0918-D2   | 100.0                | 90.3                 | 84                   | 69.35                | 88.0                 | 72.6                 | 20.0                 | 27.4                 | 100.0                | 72.6                 |
| T0918-D3   | 83.3                 | 74.6                 | 87.5                 | 57.63                | 70.8                 | 69.5                 | 0.0                  | 5.1                  | 79.2                 | 79.7                 |
| T0923-D1   | 19.0                 | 17.5                 | 15.52                | 12.59                | 8.6                  | 9.8                  | 22.4                 | 12.6                 | 0.0                  | 7.0                  |
| T0941-D1   | 1.5                  | 4.1                  | 8.7                  | 5.85                 | 1.5                  | 1.2                  | 1.5                  | 4.1                  | 2.9                  | 2.9                  |
| T0946-D1   | 93.8                 | 67.5                 | 62.5                 | 57.5                 | 68.8                 | 37.5                 | 6.3                  | 10.0                 | 37.5                 | 30.0                 |
| <b>Avg</b> | <b>46.3</b>          | <b>36.8</b>          | <b>42.9</b>          | <b>34.7</b>          | <b>45.7</b>          | <b>36.8</b>          | <b>24.9</b>          | <b>18.5</b>          | <b>53.4</b>          | <b>39.3</b>          |

**Table S5.** Performance of DNCON2 on all structural domains in CASP12, measured using the precision of long-range contacts.

| Domain   | Top-5 | Top-L/10 | Top-L/5 | Top-L/2 | Top-L | Top-2L |
|----------|-------|----------|---------|---------|-------|--------|
| T0859-D1 | 0.0   | 0.0      | 0.0     | 0.0     | 0.0   | 1.8    |
| T0860-D1 | 20.0  | 14.3     | 7.4     | 17.7    | 22.1  | 15.8   |
| T0861-D1 | 100.0 | 100.0    | 98.4    | 88.5    | 78.2  | 56.1   |
| T0862-D1 | 60.0  | 44.4     | 31.6    | 14.9    | 9.7   | 7.0    |
| T0863-D1 | 40.0  | 21.1     | 12.8    | 11.3    | 7.8   | 5.4    |
| T0863-D2 | 0.0   | 19.4     | 12.7    | 6.2     | 4.5   | 2.8    |
| T0864-D1 | 100.0 | 84.0     | 77.6    | 56.1    | 43.9  | 30.9   |
| T0866-D1 | 100.0 | 80.0     | 90.5    | 78.9    | 77.9  | 55.3   |
| T0867-D1 | 0.0   | 10.0     | 19.1    | 13.5    | 13.5  | 10.6   |
| T0868-D1 | 0.0   | 16.7     | 17.4    | 20.7    | 27.6  | 18.5   |
| T0869-D1 | 60.0  | 50.0     | 52.4    | 32.7    | 24.0  | 15.9   |
| T0870-D1 | 0.0   | 25.0     | 24.0    | 16.1    | 18.7  | 13.4   |
| T0871-D1 | 100.0 | 100.0    | 100.0   | 95.0    | 75.9  | 49.5   |
| T0872-D1 | 100.0 | 100.0    | 88.9    | 75.0    | 52.3  | 33.5   |
| T0873-D1 | 80.0  | 97.8     | 95.7    | 85.7    | 65.2  | 42.6   |
| T0877-D1 | 60.0  | 57.1     | 46.4    | 38.0    | 27.5  | 19.4   |
| T0878-D1 | 100.0 | 85.3     | 59.4    | 38.4    | 28.8  | 21.8   |
| T0879-D1 | 100.0 | 100.0    | 100.0   | 93.6    | 77.3  | 55.0   |
| T0880-D2 | 60.0  | 56.3     | 48.4    | 36.7    | 26.8  | 18.8   |
| T0881-D1 | 0.0   | 0.0      | 0.0     | 5.0     | 7.9   | 7.7    |
| T0882-D1 | 0.0   | 12.5     | 18.8    | 12.5    | 15.2  | 12.0   |
| T0884-D1 | 20.0  | 42.9     | 50.0    | 33.3    | 21.1  | 14.1   |
| T0885-D1 | 100.0 | 81.8     | 78.3    | 61.4    | 38.6  | 25.9   |
| T0886-D1 | 100.0 | 100.0    | 100.0   | 82.9    | 78.3  | 62.3   |
| T0886-D2 | 100.0 | 100.0    | 100.0   | 93.8    | 74.8  | 53.5   |
| T0888-D1 | 60.0  | 75.0     | 54.2    | 29.5    | 22.3  | 14.9   |
| T0889-D1 | 100.0 | 100.0    | 97.9    | 94.2    | 83.3  | 58.2   |
| T0890-D1 | 100.0 | 75.0     | 68.8    | 39.0    | 25.6  | 18.9   |
| T0890-D2 | 40.0  | 18.2     | 19.1    | 15.1    | 15.1  | 13.2   |
| T0891-D1 | 100.0 | 100.0    | 95.5    | 96.4    | 86.6  | 56.3   |
| T0892-D1 | 80.0  | 71.4     | 50.0    | 40.0    | 21.7  | 15.2   |
| T0892-D2 | 100.0 | 90.9     | 68.2    | 49.1    | 36.4  | 23.6   |
| T0893-D1 | 0.0   | 28.6     | 13.3    | 16.2    | 13.7  | 11.6   |
| T0893-D2 | 100.0 | 100.0    | 100.0   | 96.5    | 86.4  | 61.8   |
| T0894-D1 | 100.0 | 100.0    | 88.9    | 48.9    | 27.0  | 16.3   |
| T0894-D2 | 80.0  | 80.0     | 63.6    | 40.7    | 25.9  | 17.6   |
| T0895-D1 | 40.0  | 50.0     | 29.2    | 21.7    | 16.7  | 11.7   |
| T0896-D1 | 0.0   | 0.0      | 5.9     | 11.6    | 16.3  | 16.3   |
| T0896-D2 | 20.0  | 10.0     | 25.0    | 20.0    | 17.5  | 12.8   |
| T0896-D3 | 40.0  | 12.5     | 12.5    | 6.2     | 6.8   | 5.6    |
| T0897-D1 | 0.0   | 0.0      | 3.6     | 7.3     | 8.0   | 5.4    |
| T0897-D2 | 100.0 | 91.7     | 48.0    | 27.4    | 23.4  | 17.3   |
| T0898-D1 | 20.0  | 27.3     | 19.1    | 15.1    | 10.4  | 9.9    |
| T0898-D2 | 20.0  | 16.7     | 9.1     | 10.7    | 7.3   | 10.9   |
| T0899-D1 | 100.0 | 92.3     | 90.4    | 56.9    | 36.7  | 22.2   |
| T0899-D2 | 80.0  | 77.8     | 55.6    | 34.1    | 22.7  | 14.8   |
| T0900-D1 | 100.0 | 100.0    | 95.0    | 82.4    | 59.8  | 41.7   |
| T0901-D1 | 100.0 | 100.0    | 97.8    | 82.1    | 60.5  | 43.3   |
| T0901-D2 | 100.0 | 100.0    | 100.0   | 57.1    | 35.7  | 22.1   |
| T0902-D1 | 100.0 | 100.0    | 93.5    | 89.7    | 84.4  | 57.6   |
| T0903-D1 | 100.0 | 96.9     | 93.9    | 87.7    | 65.4  | 34.4   |
| T0904-D1 | 100.0 | 88.0     | 84.0    | 63.5    | 39.4  | 23.3   |
| T0905-D1 | 100.0 | 95.8     | 89.6    | 64.5    | 49.6  | 34.1   |
| T0905-D2 | 100.0 | 100.0    | 84.6    | 54.6    | 39.4  | 26.5   |
| T0909-D1 | 80.0  | 65.6     | 50.8    | 37.8    | 28.5  | 19.8   |
| T0911-D1 | 100.0 | 87.8     | 84.2    | 83.8    | 70.3  | 48.8   |
| T0912-D1 | 100.0 | 100.0    | 98.8    | 88.9    | 81.4  | 59.5   |
| T0912-D2 | 100.0 | 100.0    | 88.2    | 64.3    | 49.4  | 36.1   |
| T0912-D3 | 100.0 | 90.0     | 81.0    | 63.5    | 42.7  | 28.6   |
| T0913-D1 | 100.0 | 88.2     | 83.8    | 74.0    | 58.0  | 40.8   |
| T0914-D1 | 0.0   | 18.8     | 18.8    | 10.1    | 7.6   | 6.0    |
| T0914-D2 | 20.0  | 25.0     | 21.9    | 13.6    | 10.5  | 8.6    |
| T0915-D1 | 0.0   | 20.0     | 32.3    | 23.4    | 16.9  | 11.4   |
| T0917-D1 | 100.0 | 100.0    | 100.0   | 91.8    | 83.4  | 63.4   |
| T0918-D1 | 100.0 | 90.9     | 81.8    | 70.4    | 52.8  | 31.9   |
| T0918-D2 | 100.0 | 100.0    | 100.0   | 72.6    | 56.1  | 43.1   |
| T0918-D3 | 100.0 | 75.0     | 79.2    | 79.7    | 66.1  | 37.3   |

|                |             |             |             |             |             |             |
|----------------|-------------|-------------|-------------|-------------|-------------|-------------|
| T0920-D1       | 100.0       | 100.0       | 98.4        | 90.1        | 75.7        | 53.9        |
| T0920-D2       | 0.0         | 13.6        | 13.6        | 12.7        | 8.7         | 5.5         |
| T0921-D1       | 100.0       | 100.0       | 96.4        | 84.1        | 66.7        | 53.6        |
| T0922-D1       | 80.0        | 71.4        | 46.7        | 46.0        | 36.5        | 25.0        |
| T0923-D1       | 0.0         | 0.0         | 0.0         | 7.0         | 7.7         | 7.5         |
| T0928-D1       | 100.0       | 94.1        | 86.8        | 65.5        | 50.4        | 34.9        |
| T0941-D1       | 0.0         | 0.0         | 2.9         | 2.9         | 1.8         | 1.6         |
| T0942-D1       | 80.0        | 88.2        | 74.3        | 49.4        | 30.6        | 19.4        |
| T0942-D2       | 100.0       | 85.7        | 74.4        | 55.1        | 31.8        | 19.4        |
| T0943-D1       | 0.0         | 0.0         | 0.0         | 29.0        | 32.3        | 18.6        |
| T0943-D2       | 100.0       | 97.8        | 95.5        | 79.0        | 57.5        | 38.8        |
| T0944-D1       | 100.0       | 96.0        | 88.2        | 84.3        | 74.7        | 50.2        |
| T0945-D1       | 100.0       | 94.7        | 92.0        | 71.8        | 51.5        | 33.2        |
| T0946-D1       | 60.0        | 50.0        | 37.5        | 30.0        | 20.0        | 16.3        |
| T0946-D2       | 100.0       | 95.2        | 95.2        | 84.0        | 66.0        | 42.7        |
| T0947-D1       | 100.0       | 94.4        | 88.6        | 79.6        | 66.3        | 44.3        |
| T0948-D1       | 40.0        | 46.7        | 36.7        | 22.7        | 18.8        | 12.4        |
| <b>Average</b> | <b>67.1</b> | <b>65.3</b> | <b>59.9</b> | <b>49.2</b> | <b>39.1</b> | <b>27.1</b> |

**Table S6.** Performance of DNCON2 on CASP11 free-modeling domains, measured using top L/5 (upper table) and L/2 (lower table) long-range, medium-range, and short-range contacts, and comparison with MetaPSICOV (local run), and the best performing method in CASP11, CONSIP2.

| FM Domain      | Long-Range (Top L/5) |             |             | Medium-Range (Top L/5) |             |             | Short-Range (Top L/5) |             |             |
|----------------|----------------------|-------------|-------------|------------------------|-------------|-------------|-----------------------|-------------|-------------|
|                | CONSIP2              | MetaPSICOV  | DNCON2      | CONSIP2                | MetaPSICOV  | DNCON2      | CONSIP2               | MetaPSICOV  | DNCON2      |
| T0761-D1       | 5.6                  | 0.0         | 5.6         | 38.9                   | 33.3        | 16.7        | 77.8                  | 72.2        | 16.7        |
| T0761-D2       | 8.7                  | 13.0        | 4.4         | 69.6                   | 65.2        | 65.2        | 60.9                  | 69.6        | 56.5        |
| T0763-D1       | 46.2                 | 15.4        | 30.8        | 53.9                   | 61.5        | 30.8        | 61.5                  | 57.7        | 34.6        |
| T0767-D2       | 58.3                 | 66.7        | 50.0        | 22.2                   | 33.3        | 52.8        | 16.7                  | 19.4        | 19.4        |
| T0771-D1       | 10.0                 | 16.7        | 70.0        | 40.0                   | 46.7        | 60.0        | 56.7                  | 63.3        | 70.0        |
| T0777-D1       | 23.2                 | 18.8        | 18.8        | 29.0                   | 27.5        | 18.8        | 49.3                  | 40.6        | 42.0        |
| T0781-D1       | 5.0                  | 2.5         | 2.5         | 32.5                   | 42.5        | 40.0        | 52.5                  | 57.5        | 55.0        |
| T0785-D1       | 18.2                 | 4.6         | 18.2        | 27.3                   | 27.3        | 72.7        | 50.0                  | 59.1        | 50.0        |
| T0789-D1       | 51.7                 | 62.1        | 100.0       | 69.0                   | 69.0        | 86.2        | 65.5                  | 69.0        | 75.9        |
| T0789-D2       | 28.0                 | 60.0        | 92.0        | 80.0                   | 80.0        | 100.0       | 92.0                  | 92.0        | 100.0       |
| T0790-D1       | 44.4                 | 59.3        | 85.2        | 81.5                   | 77.8        | 88.9        | 88.9                  | 92.6        | 100.0       |
| T0790-D2       | 26.9                 | 69.2        | 96.2        | 69.2                   | 80.8        | 100.0       | 84.6                  | 96.2        | 100.0       |
| T0791-D1       | 53.3                 | 66.7        | 93.3        | 56.7                   | 66.7        | 63.3        | 76.7                  | 83.3        | 86.7        |
| T0791-D2       | 42.9                 | 75.0        | 92.9        | 75.0                   | 96.4        | 89.3        | 57.1                  | 75.0        | 85.7        |
| T0794-D2       | 26.5                 | 38.2        | 94.1        | 38.2                   | 55.9        | 79.4        | 47.1                  | 55.9        | 88.2        |
| T0806-D1       | 84.3                 | 70.6        | 98.0        | 70.6                   | 47.1        | 84.3        | 64.7                  | 64.7        | 74.5        |
| T0808-D2       | 35.2                 | 27.8        | 92.6        | 59.3                   | 74.1        | 70.4        | 70.4                  | 74.1        | 75.9        |
| T0810-D1       | 17.4                 | 21.7        | 21.7        | 4.4                    | 0.0         | 8.7         | 0.0                   | 13.0        | 17.4        |
| T0814-D1       | 37.0                 | 48.2        | 100.0       | 59.3                   | 59.3        | 77.8        | 55.6                  | 44.4        | 44.4        |
| T0814-D2       | 82.6                 | 73.9        | 100.0       | 73.9                   | 69.6        | 100.0       | 73.9                  | 65.2        | 91.3        |
| T0820-D1       | 5.6                  | 5.6         | 0.0         | 33.3                   | 27.8        | 11.1        | 16.7                  | 0.0         | 5.6         |
| T0824-D1       | 45.5                 | 72.7        | 81.8        | 36.4                   | 68.2        | 77.3        | 45.5                  | 22.7        | 40.9        |
| T0827-D2       | 10.0                 | 20.0        | 33.3        | 26.7                   | 26.7        | 46.7        | 43.3                  | 46.7        | 43.3        |
| T0831-D2       | 7.7                  | 7.7         | 10.3        | 28.2                   | 25.6        | 25.6        | 20.5                  | 20.5        | 23.1        |
| T0832-D1       | 2.4                  | 4.8         | 16.7        | 9.5                    | 19.1        | 19.1        | 38.1                  | 38.1        | 33.3        |
| T0834-D1       | 5.0                  | 0.0         | 0.0         | 40.0                   | 40.0        | 50.0        | 85.0                  | 80.0        | 85.0        |
| T0834-D2       | 17.7                 | 5.9         | 23.5        | 35.3                   | 35.3        | 29.4        | 47.1                  | 23.5        | 41.2        |
| T0836-D1       | 43.9                 | 68.3        | 43.9        | 19.5                   | 24.4        | 24.4        | 14.6                  | 14.6        | 12.2        |
| T0837-D1       | 29.2                 | 37.5        | 20.8        | 16.7                   | 29.2        | 20.8        | 25.0                  | 29.2        | 33.3        |
| T0855-D1       | 17.4                 | 0.0         | 4.4         | 69.6                   | 69.6        | 47.8        | 78.3                  | 69.6        | 73.9        |
| <b>Average</b> | <b>29.7</b>          | <b>34.4</b> | <b>50.0</b> | <b>45.5</b>            | <b>49.3</b> | <b>55.3</b> | <b>53.9</b>           | <b>53.7</b> | <b>55.9</b> |

| FM Domain      | Long-Range (Top L/2) |             |             | Medium-Range (Top L/2) |             |             | Short-Range (Top L/2) |             |             |
|----------------|----------------------|-------------|-------------|------------------------|-------------|-------------|-----------------------|-------------|-------------|
|                | CONSIP2              | MetaPSICOV  | DNCON2      | CONSIP2                | MetaPSICOV  | DNCON2      | CONSIP2               | MetaPSICOV  | DNCON2      |
| T0761-D1       | 4.6                  | 2.3         | 11.4        | 27.3                   | 25.0        | 25.0        | 45.5                  | 47.7        | 18.2        |
| T0761-D2       | 5.3                  | 5.3         | 7.0         | 45.6                   | 56.1        | 43.9        | 42.1                  | 57.9        | 35.1        |
| T0763-D1       | 26.2                 | 12.3        | 16.9        | 33.9                   | 47.7        | 33.9        | 41.5                  | 38.5        | 24.6        |
| T0767-D2       | 44.4                 | 41.1        | 35.6        | 12.2                   | 27.8        | 23.3        | 11.1                  | 13.3        | 12.2        |
| T0771-D1       | 6.6                  | 14.5        | 44.7        | 31.6                   | 32.9        | 43.4        | 39.5                  | 42.1        | 42.1        |
| T0777-D1       | 12.7                 | 14.5        | 19.1        | 16.8                   | 15.6        | 15.6        | 34.1                  | 30.1        | 31.2        |
| T0781-D1       | 6.0                  | 1.0         | 3.0         | 21.0                   | 25.0        | 32.0        | 31.0                  | 33.0        | 31.0        |
| T0785-D1       | 12.5                 | 10.7        | 25.0        | 28.6                   | 30.4        | 51.8        | 28.6                  | 33.9        | 33.9        |
| T0789-D1       | 43.1                 | 48.6        | 80.6        | 43.1                   | 52.8        | 65.3        | 38.9                  | 43.1        | 41.7        |
| T0789-D2       | 19.1                 | 41.3        | 69.8        | 52.4                   | 57.1        | 66.7        | 55.6                  | 57.1        | 60.3        |
| T0790-D1       | 39.7                 | 44.1        | 64.7        | 52.9                   | 58.8        | 64.7        | 67.7                  | 73.5        | 73.5        |
| T0790-D2       | 20.0                 | 44.6        | 63.1        | 50.8                   | 58.5        | 66.2        | 58.5                  | 55.4        | 61.5        |
| T0791-D1       | 41.3                 | 56.0        | 78.7        | 36.0                   | 38.7        | 32.0        | 49.3                  | 44.0        | 52.0        |
| T0791-D2       | 29.0                 | 52.2        | 71.0        | 49.3                   | 71.0        | 72.5        | 46.4                  | 46.4        | 53.6        |
| T0794-D2       | 24.4                 | 38.4        | 77.9        | 33.7                   | 32.6        | 46.5        | 30.2                  | 32.6        | 52.3        |
| T0806-D1       | 60.9                 | 57.8        | 82.0        | 39.1                   | 37.5        | 60.2        | 39.8                  | 41.4        | 51.6        |
| T0808-D2       | 25.2                 | 32.6        | 78.5        | 44.4                   | 50.4        | 50.4        | 48.2                  | 51.1        | 54.8        |
| T0810-D1       | 12.3                 | 15.8        | 10.5        | 3.5                    | 5.3         | 5.3         | 3.5                   | 8.8         | 15.8        |
| T0814-D1       | 37.7                 | 33.3        | 84.1        | 33.3                   | 33.3        | 49.3        | 33.3                  | 33.3        | 40.6        |
| T0814-D2       | 50.0                 | 41.4        | 84.5        | 55.2                   | 63.8        | 75.9        | 56.9                  | 46.6        | 65.5        |
| T0820-D1       | 4.4                  | 2.2         | 4.4         | 22.2                   | 22.2        | 17.8        | 6.7                   | 4.4         | 4.4         |
| T0824-D1       | 37.0                 | 51.9        | 70.4        | 22.2                   | 33.3        | 48.2        | 22.2                  | 16.7        | 22.2        |
| T0827-D2       | 12.0                 | 16.0        | 26.7        | 18.7                   | 18.7        | 24.0        | 26.7                  | 28.0        | 33.3        |
| T0831-D2       | 6.1                  | 5.1         | 14.1        | 16.2                   | 15.2        | 16.2        | 12.1                  | 13.1        | 13.1        |
| T0832-D1       | 2.9                  | 11.4        | 10.5        | 12.4                   | 17.1        | 13.3        | 21.9                  | 24.8        | 29.5        |
| T0834-D1       | 2.0                  | 0.0         | 0.0         | 28.0                   | 18.0        | 26.0        | 50.0                  | 48.0        | 52.0        |
| T0834-D2       | 16.3                 | 9.3         | 20.9        | 27.9                   | 23.3        | 32.6        | 23.3                  | 11.6        | 23.3        |
| T0836-D1       | 31.4                 | 53.9        | 23.5        | 13.7                   | 13.7        | 14.7        | 9.8                   | 9.8         | 7.8         |
| T0837-D1       | 18.0                 | 21.3        | 11.5        | 16.4                   | 18.0        | 19.7        | 19.7                  | 18.0        | 26.2        |
| T0855-D1       | 13.8                 | 10.3        | 3.5         | 65.5                   | 60.3        | 41.4        | 58.6                  | 48.3        | 55.2        |
| <b>Average</b> | <b>22.2</b>          | <b>26.3</b> | <b>39.8</b> | <b>31.8</b>            | <b>35.3</b> | <b>39.2</b> | <b>35.1</b>           | <b>35.1</b> | <b>37.3</b> |

**Table S7.** Performance of DNCON2 on CASP10 free-modeling domains, measured using top L/5 (upper table) and L/2 (lower table) long-range, medium-range, and short-range contacts, and comparison with MetaPSICOV (local run), and the best performing method in CASP10, DNCON.

| FM Domain      | Long-Range (Top L/5) |             |             | Medium-Range (Top L/5) |             |             | Short-Range (Top L/5) |             |             |
|----------------|----------------------|-------------|-------------|------------------------|-------------|-------------|-----------------------|-------------|-------------|
|                | DNCON                | MetaPSICOV  | DNCON2      | DNCON                  | MetaPSICOV  | DNCON2      | DNCON                 | MetaPSICOV  | DNCON2      |
| T0658-D1       | 24.2                 | 60.6        | 75.8        | 6.1                    | 6.1         | 9.1         | 12.1                  | 18.2        | 15.2        |
| T0666-D1       | 11.1                 | 27.8        | 41.7        | 5.6                    | 13.9        | 27.8        | 11.1                  | 11.1        | 19.4        |
| T0684-D2       | 38.2                 | 61.8        | 38.2        | 5.9                    | 14.7        | 14.7        | 23.5                  | 26.5        | 20.6        |
| T0693-D1       | 10.0                 | 5.0         | 5.0         | 20.0                   | 40.0        | 35.0        | 40.0                  | 50.0        | 70.0        |
| T0695-D1       | 27.9                 | 26.0        | 23.1        | 18.3                   | 11.5        | 13.5        | 5.8                   | 10.6        | 12.5        |
| T0719-D6       | 33.3                 | 21.2        | 0.0         | 39.4                   | 0.0         | 21.2        | 39.4                  | 30.3        | 39.4        |
| T0726-D3       | 0.0                  | 58.3        | 100.0       | 8.3                    | 25.0        | 0.0         | 25.0                  | 41.7        | 50.0        |
| T0734-D1       | 7.1                  | 16.7        | 76.2        | 26.2                   | 31.0        | 38.1        | 35.7                  | 47.6        | 64.3        |
| T0735-D2       | 16.7                 | 50.0        | 50.0        | 11.1                   | 33.3        | 22.2        | 38.9                  | 38.9        | 50.0        |
| T0737-D1       | 13.0                 | 30.4        | 13.0        | 0.0                    | 0.0         | 4.4         | 26.1                  | 21.7        | 26.1        |
| T0739-D1       | 11.8                 | 11.8        | 5.9         | 58.8                   | 47.1        | 58.8        | 58.8                  | 58.8        | 76.5        |
| T0739-D2       | 58.3                 | 66.7        | 91.7        | 41.7                   | 41.7        | 33.3        | 50.0                  | 66.7        | 83.3        |
| T0740-D1       | 16.1                 | 19.4        | 0.0         | 12.9                   | 22.6        | 19.4        | 12.9                  | 12.9        | 12.9        |
| T0741-D1       | 4.0                  | 4.0         | 4.0         | 24.0                   | 8.0         | 4.0         | 24.0                  | 40.0        | 0.0         |
| T0756-D2       | 0.0                  | 0.0         | 0.0         | 0.0                    | 5.9         | 11.8        | 17.7                  | 23.5        | 35.3        |
| <b>Average</b> | <b>18.1</b>          | <b>30.6</b> | <b>35.0</b> | <b>18.5</b>            | <b>20.0</b> | <b>20.9</b> | <b>28.1</b>           | <b>33.2</b> | <b>38.4</b> |

| FM Domain      | Long-Range (Top L/2) |             |             | Medium-Range (Top L/2) |             |             | Short-Range (Top L/2) |             |             |
|----------------|----------------------|-------------|-------------|------------------------|-------------|-------------|-----------------------|-------------|-------------|
|                | DNCON                | MetaPSICOV  | DNCON2      | DNCON                  | MetaPSICOV  | DNCON2      | DNCON                 | MetaPSICOV  | DNCON2      |
| T0658-D1       | 19.3                 | 36.1        | 62.7        | 9.6                    | 6.0         | 13.3        | 15.7                  | 12.1        | 14.5        |
| T0666-D1       | 8.9                  | 21.1        | 26.7        | 7.8                    | 12.2        | 21.1        | 4.4                   | 7.8         | 8.9         |
| T0684-D2       | 26.2                 | 44.1        | 33.3        | 7.1                    | 9.5         | 17.9        | 15.5                  | 15.5        | 13.1        |
| T0693-D1       | 12.0                 | 6.0         | 10.0        | 20.0                   | 26.0        | 24.0        | 26.0                  | 40.0        | 42.0        |
| T0695-D1       | 18.0                 | 18.0        | 14.6        | 10.3                   | 10.3        | 10.0        | 5.8                   | 6.9         | 6.1         |
| T0719-D6       | 17.1                 | 13.4        | 22.0        | 23.2                   | 3.7         | 17.1        | 31.7                  | 24.4        | 23.2        |
| T0726-D3       | 0.0                  | 40.0        | 83.3        | 16.7                   | 23.3        | 3.3         | 10.0                  | 23.3        | 26.7        |
| T0734-D1       | 6.6                  | 13.2        | 48.1        | 15.1                   | 23.6        | 29.3        | 22.6                  | 29.3        | 30.2        |
| T0735-D2       | 6.8                  | 34.1        | 31.8        | 6.8                    | 29.6        | 15.9        | 18.2                  | 18.2        | 25.0        |
| T0737-D1       | 17.0                 | 13.6        | 22.0        | 1.7                    | 0.0         | 5.1         | 20.3                  | 22.0        | 22.0        |
| T0739-D1       | 9.3                  | 7.0         | 4.7         | 39.5                   | 34.9        | 44.2        | 48.8                  | 39.5        | 67.4        |
| T0739-D2       | 51.7                 | 41.4        | 51.7        | 24.1                   | 24.1        | 27.6        | 27.6                  | 27.6        | 51.7        |
| T0740-D1       | 11.5                 | 18.0        | 7.7         | 6.4                    | 12.8        | 11.5        | 7.7                   | 9.0         | 6.4         |
| T0741-D1       | 7.9                  | 7.9         | 4.8         | 19.1                   | 19.1        | 6.4         | 22.2                  | 34.9        | 1.6         |
| T0756-D2       | 0.0                  | 2.3         | 0.0         | 4.7                    | 2.3         | 4.7         | 9.3                   | 11.6        | 16.3        |
| <b>Average</b> | <b>14.2</b>          | <b>21.1</b> | <b>28.2</b> | <b>14.1</b>            | <b>15.8</b> | <b>16.7</b> | <b>19.1</b>           | <b>21.5</b> | <b>23.7</b> |

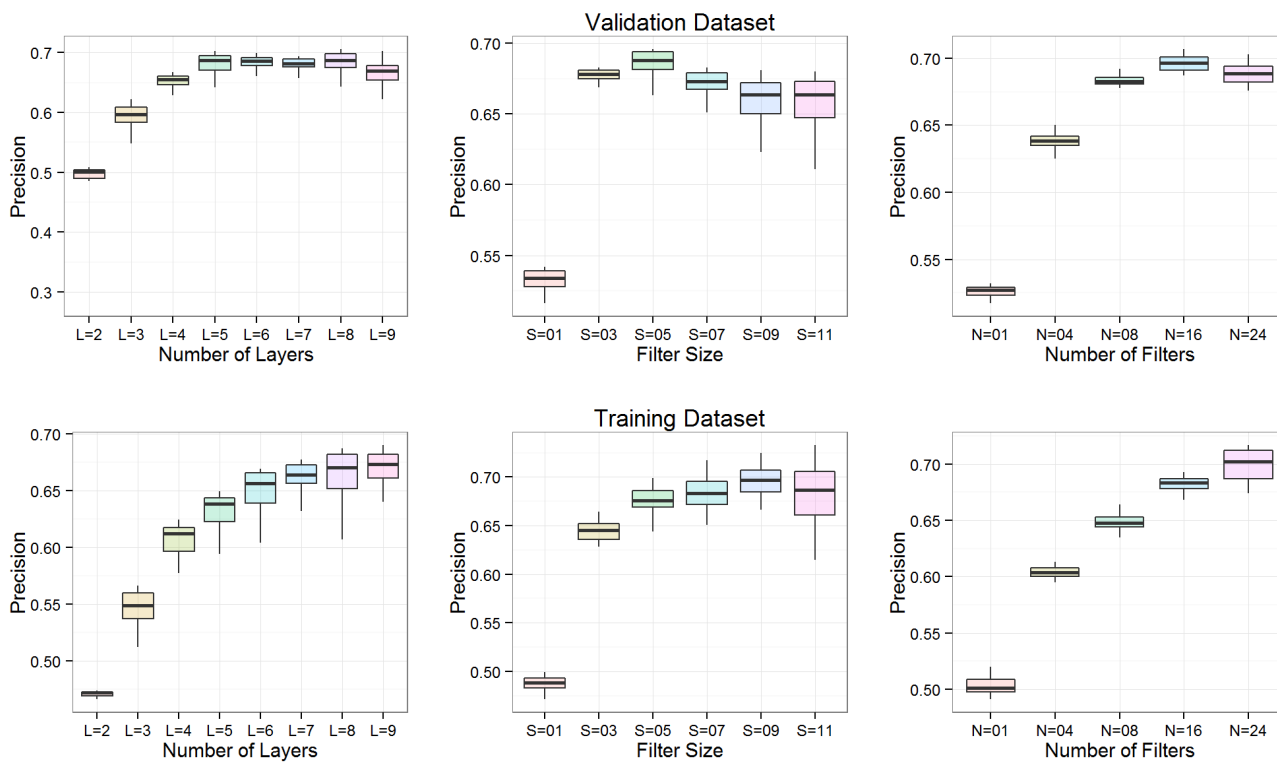

**Figure S8.** Effect of number of layers (first column), filter size (second column), and number of filters (last column) on the precision of top L/5 long-range predictions for the 195 proteins in the validation dataset (top row) and a sample of training data set (bottom row). The increasing performance on training dataset (plots in bottom row) shows that increasing the filter size, number of filters, and depth of the network increase the learning capacity of the network. Data collected for these plots are from the 30 best models obtained over 40 epochs of training.

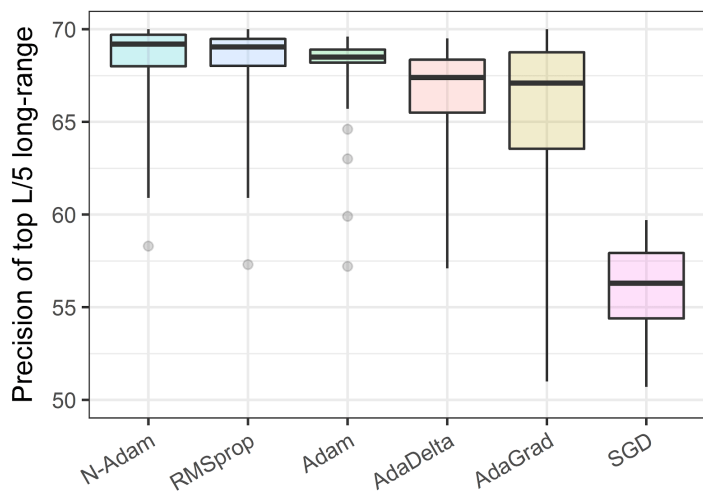

**Figure S9.** Comparison of the performance of various optimization functions (ADADELTA, Adagrad, Adam, Nesterov Adam, RMSprop, and Stochastic gradient descent) on the 195 proteins in the validation dataset.

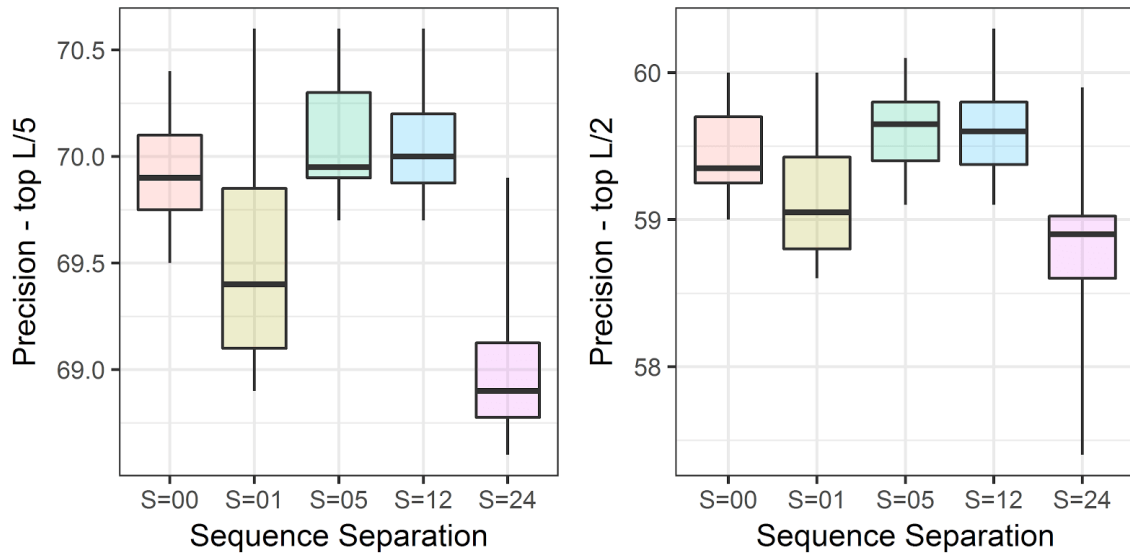

**Figure S10.** Precision of top L/5 (left) and L/2 (right) long-range contacts on the 195 proteins in validation dataset using models that are trained with contacts at minimum sequence separation 0, 1, 5, 12, and 24. The sequence separation at 12 corresponds to training using medium-range and long-range contacts, and the sequence separation at 24 corresponds to training using long-range contacts only.
